# Supplementary material
Source: MDPI journal article supplement (https://www.mdpi.com/2071-1050/14/19/12369)
Supplement: s1 [file s1 › sustainability-1856584-supplementary.pdf]

## Supplementary Information (SI) For Sustainability

# Influence of Organic Amendments on Soil Carbon Sequestration Potential of Paddy Soils under Two Irrigation Regimes

Sabina Yeasmin <sup>1,\*</sup>, Assaduzzaman <sup>1</sup>, Md. Shirajul Kabir <sup>1</sup>, Md. Parvez Anwar <sup>1</sup>, A. K. M. Mominul Islam <sup>1</sup> and Tahsina Sharmin Hoque <sup>2</sup>

<sup>1</sup> Agro Innovation Laboratory, Department of Agronomy, Bangladesh Agricultural University, Mymensingh 2202, Bangladesh

<sup>2</sup> Department of Soil Science, Bangladesh Agricultural University, Mymensingh 2202, Bangladesh

\* Correspondence: sabinayeammin@bau.edu.bd; Tel.: +880-1618-512082

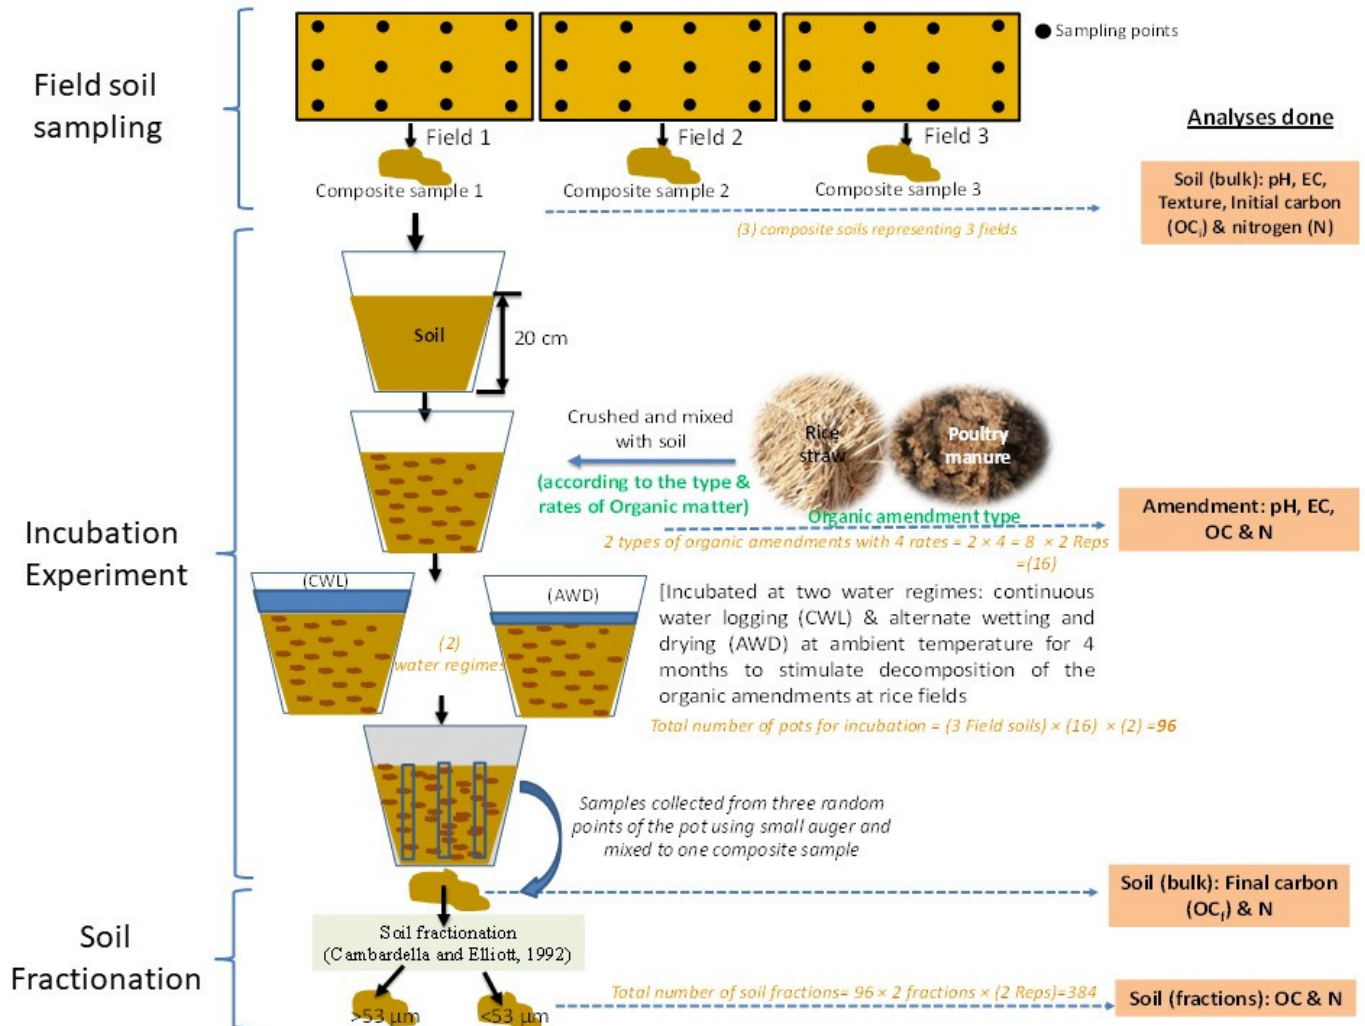

Figure S1. Graphical details of all experimental steps.

**Table S1.** Effect of irrigation regime and organic amendment on soil organic carbon, total nitrogen, C:N ratio and carbon sequestration.

| Treatment                    | Organic carbon<br>(%) | Total nitrogen     | C: N<br>ratio      | C sequestration<br>potential (%) |
|------------------------------|-----------------------|--------------------|--------------------|----------------------------------|
| <b>Irrigation regime</b>     |                       |                    |                    |                                  |
| Continuous water logging     | 1.23 <sup>a</sup>     | 0.116              | 10.55              | 47.4 <sup>a</sup>                |
| Alternate wetting and drying | 1.13 <sup>b</sup>     | 0.108              | 10.45              | 35.2 <sup>b</sup>                |
| Level of significance        | **                    | NS                 | NS                 | **                               |
| CV (%)                       | 6.21                  | 8.01               | 4.84               | 3.15                             |
| <b>Organic amendment</b>     |                       |                    |                    |                                  |
| Poultry manure               | 1.25 <sup>a</sup>     | 0.123 <sup>a</sup> | 10.16 <sup>b</sup> | 45 <sup>a</sup>                  |
| Rice straw                   | 1.13 <sup>b</sup>     | 0.105 <sup>b</sup> | 10.77 <sup>a</sup> | 37 <sup>b</sup>                  |
| Level of significance        | **                    | **                 | *                  | **                               |
| CV (%)                       | 6.20                  | 3.94               | 3.95               | 4.28                             |

CV = coefficient of variation. In the columns, means followed by different letters are significantly different. \*means at 5% level of probability, \*\*means at 1% level of probability, NS means not significant.

**Table S2.** Interaction effect of irrigation regime and organic amendment on soil organic carbon, total nitrogen, C:N ratio and carbon sequestration.

| Interaction           | Organic carbon (%)  | Total nitrogen (%)  | C: N ratio          | Carbon<br>sequestration (%) |
|-----------------------|---------------------|---------------------|---------------------|-----------------------------|
| CWL×PM                | 1.305 <sup>a</sup>  | 0.1233 <sup>a</sup> | 10.49 <sup>ab</sup> | 55.1 <sup>a</sup>           |
| CWL×RS                | 1.158 <sup>bc</sup> | 0.1033 <sup>b</sup> | 11.10 <sup>a</sup>  | 43.0 <sup>b</sup>           |
| AWD×PM                | 1.195 <sup>b</sup>  | 0.1217 <sup>a</sup> | 9.84 <sup>b</sup>   | 42.9 <sup>b</sup>           |
| AWD×RS                | 1.098 <sup>c</sup>  | 0.1050 <sup>b</sup> | 10.44 <sup>ab</sup> | 31.1 <sup>c</sup>           |
| Level of significance | *                   | *                   | *                   | **                          |
| CV (%)                | 4.46                | 5.66                | 5.69                | 6.87                        |
| SE (±)                | 0.030               | 0.007               | 0.730               | 0.34                        |

Irrigation regime: CWL = continuous waterlogging, AWD = alternate wetting and drying, organic amendment: PM = poultry manure, RS = rice straw, CV = coefficient of variation, SE= standard error. In the columns, means followed by different letters are significantly different. \*means at 5% level of probability and \*\*means at 1% level of probability.

**Table S3.** Effect of organic amendment rate of a specific amendment type on soil organic carbon, total nitrogen, C:N ratio and carbon sequestration under particular irrigation regime.

| Organic amendment                   | Amendment rate (g kg <sup>-1</sup> soil) | Organic carbon (%) | Total nitrogen (%)  | C: N ratio          | Carbon sequestration (%) |
|-------------------------------------|------------------------------------------|--------------------|---------------------|---------------------|--------------------------|
| <i>Continuous water logging</i>     |                                          |                    |                     |                     |                          |
| Poultry manure                      | 0                                        | 1.18 <sup>b</sup>  | 0.121 <sup>ab</sup> | 9.82 <sup>c</sup>   | 42.00 <sup>c</sup>       |
|                                     | 2.5                                      | 1.24 <sup>b</sup>  | 0.124 <sup>ab</sup> | 10.10 <sup>b</sup>  | 49.09 <sup>b</sup>       |
|                                     | 5.0                                      | 1.39 <sup>a</sup>  | 0.131 <sup>a</sup>  | 10.71 <sup>a</sup>  | 67.73 <sup>a</sup>       |
|                                     | 15.0                                     | 1.27 <sup>b</sup>  | 0.120 <sup>ab</sup> | 10.64 <sup>a</sup>  | 48.49 <sup>b</sup>       |
|                                     | Level of significance                    | *                  | ***                 | *                   | *                        |
|                                     | CV (%)                                   | 6.23               | 4.28                | 5.80                | 4.96                     |
|                                     | SE (±)                                   | 0.06               | 0.25                | 0.36                | 1.76                     |
| <i>Alternate wetting and drying</i> |                                          |                    |                     |                     |                          |
| Rice straw                          | 0                                        | 1.18 <sup>b</sup>  | 0.121 <sup>a</sup>  | 9.82 <sup>c</sup>   | 42.00 <sup>a</sup>       |
|                                     | 2.5                                      | 1.19 <sup>b</sup>  | 0.104 <sup>ab</sup> | 11.56 <sup>a</sup>  | 45.48 <sup>a</sup>       |
|                                     | 5.0                                      | 1.23 <sup>a</sup>  | 0.110 <sup>ab</sup> | 11.25 <sup>ab</sup> | 47.47 <sup>a</sup>       |
|                                     | 15.0                                     | 1.04 <sup>c</sup>  | 0.100 <sup>b</sup>  | 10.48 <sup>b</sup>  | 36.04 <sup>b</sup>       |
|                                     | Level of significance                    | **                 | *                   | *                   | *                        |
|                                     | CV (%)                                   | 4.61               | 6.63                | 2.20                | 6.90                     |
|                                     | SE (±)                                   | 0.03               | 0.07                | 1.04                | 1.35                     |
| <i>Alternate wetting and drying</i> |                                          |                    |                     |                     |                          |
| Poultry manure                      | 0                                        | 1.05 <sup>b</sup>  | 0.093 <sup>b</sup>  | 11.38 <sup>a</sup>  | 25.00 <sup>c</sup>       |
|                                     | 2.5                                      | 1.12 <sup>b</sup>  | 0.111 <sup>ab</sup> | 10.27 <sup>a</sup>  | 34.66 <sup>b</sup>       |
|                                     | 5.0                                      | 1.33 <sup>a</sup>  | 0.130 <sup>a</sup>  | 10.25 <sup>ab</sup> | 58.71 <sup>a</sup>       |
|                                     | 15.0                                     | 1.13 <sup>b</sup>  | 0.125 <sup>ab</sup> | 9.01 <sup>b</sup>   | 35.27 <sup>b</sup>       |
|                                     | Level of significance                    | *                  | **                  | *                   | ***                      |
|                                     | CV (%)                                   | 5.45               | 4.43                | 6.79                | 5.68                     |
|                                     | SE (±)                                   | 0.07               | 0.02                | 1.87                | 2.13                     |
| <i>Alternate wetting and drying</i> |                                          |                    |                     |                     |                          |
| Rice straw                          | 0                                        | 1.05 <sup>b</sup>  | 0.093 <sup>c</sup>  | 11.38 <sup>a</sup>  | 25.00 <sup>b</sup>       |
|                                     | 2.5                                      | 1.13 <sup>a</sup>  | 0.105 <sup>ab</sup> | 10.79 <sup>a</sup>  | 34.66 <sup>a</sup>       |
|                                     | 5.0                                      | 1.12 <sup>a</sup>  | 0.110 <sup>a</sup>  | 9.99 <sup>b</sup>   | 32.86 <sup>a</sup>       |
|                                     | 15.0                                     | 1.05 <sup>b</sup>  | 0.100 <sup>ab</sup> | 10.52 <sup>ab</sup> | 25.64 <sup>b</sup>       |
|                                     | Level of significance                    | *                  | *                   | **                  | **                       |
|                                     | CV (%)                                   | 6.64               | 8.29                | 7.67                | 4.60                     |
|                                     | SE (±)                                   | 0.03               | 0.04                | 1.44                | 1.13                     |

CV = coefficient of variation, SE= standard error. In the columns, means followed by different letters are significantly different. \*means at 5% level of probability, \*\*means at 1% level of probability and \*\*\*means at 0.1% level of probability.

**Table S4.** Effect of irrigation regime on organic carbon, total nitrogen and C:N ratio of two soil fractions (<53 and >53  $\mu\text{m}$ ).

| Irrigation regime                      | Organic carbon (%) | Total nitrogen (%) | C: N ratio         |
|----------------------------------------|--------------------|--------------------|--------------------|
| <u>&lt;53 <math>\mu\text{m}</math></u> |                    |                    |                    |
| Continuous water logging               | 1.41 <sup>a</sup>  | 0.13 <sup>a</sup>  | 11.24              |
| Alternate wetting and drying           | 1.09 <sup>b</sup>  | 0.09 <sup>b</sup>  | 11.64              |
| Level of significance                  | ***                | ***                | NS                 |
| CV (%)                                 | 8.96               | 7.70               | 23.37              |
| <u>&gt;53 <math>\mu\text{m}</math></u> |                    |                    |                    |
| Continuous water logging               | 1.11               | 0.10               | 11.51 <sup>a</sup> |
| Alternate wetting and drying           | 1.16               | 0.11               | 10.48 <sup>b</sup> |
| Level of significance                  | NS                 | NS                 | *                  |
| CV (%)                                 | 20.20              | 17.59              | 19.56              |

In the columns, means followed by different letters are significantly different. CV = coefficient of variation, \* = significant at 5% level of probability, \*\*\* = significant at 0.1% level of probability, NS = not significant.

**Table S5.** Effect of organic amendment type on organic carbon, total nitrogen and C:N ratio of soil fractions (<53 and >53  $\mu\text{m}$ ) irrespective to irrigation regimes.

| Organic matter type                    | Organic carbon (%) | Total Nitrogen (%) | C:N ratio |
|----------------------------------------|--------------------|--------------------|-----------|
| <u>&lt;53 <math>\mu\text{m}</math></u> |                    |                    |           |
| Poultry manure                         | 1.35               | 0.127              | 11.18     |
| Rice straw                             | 1.26               | 0.122              | 10.35     |
| Level of significance                  | NS                 | NS                 | NS        |
| CV (%)                                 | 22.67              | 25.11              | 23.21     |
| <u>&gt;53 <math>\mu\text{m}</math></u> |                    |                    |           |
| Poultry manure                         | 1.15               | 0.11               | 10.62     |
| Rice straw                             | 1.07               | 0.10               | 10.37     |
| Level of significance                  | NS                 | NS                 | NS        |
| CV (%)                                 | 19.88              | 17.62              | 20.76     |

In the columns, means followed by different letters are significantly different. CV = coefficient of variation, NS = not significant.
